# Supplementary material for: A ground-state-directed optimization scheme for the Kohn–Sham energy
Source: Royal Society of Chemistry journal article supplement (doi:10.1039/b807639a), 2008-01-01
Supplement: b807639a.pdf [file b807639a.pdf]

SupplementaryData.txt

Supplementary Data:  
Molecular geometries of test systems (units given in parentheses).

Table 1: Cartesian coordinates of the Cd<sup>2+</sup>-imidazole complex (Bohr).

| Atom | x            | y           | z             |
|------|--------------|-------------|---------------|
| Cd   | 0.000000000  | 0.000000000 | 0.000000000   |
| N    | 0.000000000  | 0.000000000 | -4.270782744  |
| N    | -1.295300812 | 0.000000000 | -8.216595657  |
| C    | 1.277555548  | 0.000000000 | -8.286579686  |
| C    | 2.050807130  | 0.000000000 | -5.841580898  |
| C    | -1.974295739 | 0.000000000 | -5.782977653  |
| H    | 2.327254176  | 0.000000000 | -10.016981910 |
| H    | 3.946959286  | 0.000000000 | -5.123193109  |
| H    | -3.909370623 | 0.000000000 | -5.152366230  |
| H    | -2.481531661 | 0.000000000 | -9.778799182  |

Table 2: Cartesian coordinates of the 29-residue polyalanine (Angstrom).

| Atom | x        | y        | z         |
|------|----------|----------|-----------|
| C    | -4.89650 | -0.57930 | 2.59220   |
| C    | -4.79050 | 0.56470  | 1.58380   |
| C    | -3.46760 | 1.56900  | -0.21940  |
| C    | -2.15200 | 1.26200  | -0.95240  |
| C    | -3.46800 | 2.94290  | 0.45510   |
| C    | 0.27460  | 0.77750  | -0.66260  |
| C    | 0.19760  | -0.41950 | -1.62360  |
| C    | 1.22280  | 0.53720  | 0.51460   |
| C    | -0.57270 | -2.77450 | -1.88420  |
| C    | -1.23250 | -2.45770 | -3.23580  |
| C    | -1.37430 | -3.77590 | -1.04930  |
| C    | -3.17360 | -1.35870 | -4.34560  |
| C    | -2.25360 | -0.63780 | -5.34380  |
| C    | -4.36210 | -0.50160 | -3.90350  |
| C    | -0.62200 | 1.22300  | -5.63060  |
| C    | 0.37360  | 0.30040  | -6.35170  |
| C    | 0.06340  | 2.24470  | -4.72010  |
| C    | 2.02920  | -1.53720 | -6.05340  |
| C    | 1.42080  | -2.33650 | -7.21680  |
| C    | 2.50010  | -2.42690 | -4.90050  |
| C    | -0.50390 | -3.74880 | -7.92940  |
| C    | -0.67320 | -2.94410 | -9.22790  |
| C    | -1.83820 | -4.18960 | -7.32270  |
| C    | -1.47270 | -0.79450 | -10.20110 |
| C    | -0.17890 | -0.62800 | -11.01390 |
| C    | -2.01300 | 0.53200  | -9.66150  |
| C    | 2.24080  | -0.04700 | -10.89260 |
| C    | 2.62580  | -1.27960 | -11.72630 |
| C    | 3.25080  | 0.26330  | -9.78530  |
| C    | 2.88700  | -3.75710 | -11.69570 |
| C    | 2.10070  | -3.90240 | -13.00830 |
| C    | 2.60540  | -4.88790 | -10.70340 |
| C    | -0.16450 | -3.82960 | -14.04300 |
| C    | 0.33390  | -2.92480 | -15.18110 |
| C    | -1.58180 | -3.48160 | -13.58160 |
| C    | 1.03810  | -0.61210 | -15.78320 |
| C    | 2.29550  | -1.13160 | -16.49830 |
| C    | 1.27690  | 0.70230  | -15.03630 |
| C    | 4.57300  | -2.08820 | -16.17400 |
| C    | 4.30210  | -3.20060 | -17.19940 |
| C    | 5.41590  | -2.56270 | -14.98790 |
| C    | 3.10510  | -5.34770 | -17.60500 |
| C    | 2.56580  | -4.84560 | -18.95380 |

SupplementaryData.txt

|   |          |          |           |
|---|----------|----------|-----------|
| C | 2.09810  | -6.21450 | -16.84540 |
| C | 0.91080  | -3.34120 | -20.05160 |
| C | 1.98590  | -2.76440 | -20.98630 |
| C | -0.10660 | -2.29320 | -19.59430 |
| C | 3.95240  | -1.24160 | -21.13200 |
| C | 4.77770  | -2.30330 | -21.87620 |
| C | 4.78830  | -0.41590 | -20.15110 |
| C | 6.03980  | -4.43780 | -21.63530 |
| C | 5.33090  | -5.04830 | -22.85470 |
| C | 6.29120  | -5.45560 | -20.52010 |
| C | 3.19760  | -6.02740 | -23.69000 |
| C | 3.23090  | -5.14410 | -24.94750 |
| C | 1.78330  | -6.23110 | -23.14150 |
| C | 2.89180  | -2.83680 | -25.82390 |
| C | 4.22120  | -2.88420 | -26.59390 |
| C | 2.59670  | -1.45830 | -25.22780 |
| C | 6.70160  | -2.78710 | -26.38090 |
| C | 6.87270  | -4.02960 | -27.26940 |
| C | 7.71290  | -2.73060 | -25.23340 |
| C | 6.65390  | -6.50960 | -27.36490 |
| C | 5.90070  | -6.43770 | -28.70280 |
| C | 6.12670  | -7.61090 | -26.44200 |
| C | 3.72880  | -5.88020 | -29.78870 |
| C | 4.43060  | -5.03520 | -30.86390 |
| C | 2.38900  | -5.28800 | -29.34510 |
| C | 5.58480  | -2.87560 | -31.32340 |
| C | 6.74380  | -3.59310 | -32.03350 |
| C | 6.04430  | -1.66910 | -30.50140 |
| C | 8.78350  | -4.98520 | -31.70370 |
| C | 8.34080  | -5.97430 | -32.79370 |
| C | 9.47810  | -5.66940 | -30.52380 |
| C | 6.77020  | -7.82850 | -33.34360 |
| C | 6.38440  | -7.16800 | -34.67680 |
| C | 5.59000  | -8.52010 | -32.65710 |
| C | 5.08710  | -5.32210 | -35.73360 |
| C | 6.28470  | -4.91950 | -36.60880 |
| C | 4.27360  | -4.12060 | -35.24660 |
| C | 8.51000  | -3.79920 | -36.62320 |
| C | 9.14250  | -4.96340 | -37.40220 |
| C | 9.45360  | -3.19790 | -35.57880 |
| C | 9.96390  | -7.31020 | -37.24440 |
| C | 9.19430  | -7.71360 | -38.51220 |
| C | 9.97680  | -8.40940 | -36.17940 |
| C | 9.04270  | -9.33980 | -40.34860 |
| H | -3.04660 | -0.19650 | 0.90050   |
| H | -5.82730 | -0.46100 | 3.19080   |
| H | -4.92150 | -1.55190 | 2.05170   |
| H | -4.01300 | -0.56330 | 3.26890   |
| H | -4.29820 | 1.53990  | -0.95960  |
| H | -3.27930 | 3.73800  | -0.30050  |
| H | -4.45490 | 3.11810  | 0.93900   |
| H | -2.67240 | 2.97430  | 1.23290   |
| H | -1.17190 | 1.15070  | 0.85950   |
| H | 0.63690  | 1.66300  | -1.23140  |
| H | 2.24490  | 0.30660  | 0.13930   |
| H | 1.25920  | 1.44800  | 1.15330   |
| H | 0.84970  | -0.31700 | 1.12270   |
| H | -0.76200 | -1.52250 | -0.16810  |
| H | 0.43580  | -3.20410 | -2.07680  |
| H | -1.51010 | -4.72310 | -1.61790  |
| H | -0.83080 | -3.98730 | -0.10130  |
| H | -2.37060 | -3.34300 | -0.80700  |
| H | -2.76390 | -1.48250 | -2.25620  |
| H | -3.56530 | -2.28080 | -4.83030  |
| H | -4.95960 | -0.19300 | -4.79040  |
| H | -5.00460 | -1.08850 | -3.20960  |
| H | -3.98970 | 0.40380  | -3.37410  |
| H | -1.66190 | 0.66200  | -3.85510  |

SupplementaryData.txt

|   |          |          |           |
|---|----------|----------|-----------|
| H | -1.21060 | 1.77410  | -6.39780  |
| H | 0.77200  | 2.86670  | -5.31160  |
| H | -0.70560 | 2.90060  | -4.25400  |
| H | 0.61970  | 1.71130  | -3.91710  |
| H | 0.85570  | -0.58210 | -4.55040  |
| H | 2.90410  | -0.96660 | -6.43780  |
| H | 3.25120  | -3.16120 | -5.26850  |
| H | 2.95770  | -1.79450 | -4.10720  |
| H | 1.62860  | -2.97100 | -4.47230  |
| H | -0.18500 | -2.84310 | -6.02510  |
| H | 0.09800  | -4.65760 | -8.15420  |
| H | -2.40680 | -4.80200 | -8.05780  |
| H | -1.64770 | -4.79240 | -6.40660  |
| H | -2.43520 | -3.29140 | -7.04780  |
| H | -1.49920 | -1.38910 | -8.15310  |
| H | -2.24660 | -1.24800 | -10.85990 |
| H | -2.20050 | 1.23680  | -10.50220 |
| H | -2.96340 | 0.34910  | -9.11200  |
| H | -1.27040 | 0.97790  | -8.96260  |
| H | 0.83280  | -0.11060 | -9.29210  |
| H | 2.18140  | 0.83280  | -11.57170 |
| H | 4.26060  | 0.42340  | -10.22500 |
| H | 2.93370  | 1.18090  | -9.24090  |
| H | 3.28890  | -0.58790 | -9.06920  |
| H | 2.26780  | -2.49090 | -10.09520 |
| H | 3.97420  | -3.76050 | -11.93420 |
| H | 2.84990  | -5.87010 | -11.16620 |
| H | 3.22600  | -4.74340 | -9.79080  |
| H | 1.53010  | -4.87050 | -10.41690 |
| H | 0.34460  | -3.52110 | -11.99510 |
| H | -0.15990 | -4.88280 | -14.40270 |
| H | -2.28910 | -3.55250 | -14.43800 |
| H | -1.89560 | -4.18950 | -12.78200 |
| H | -1.59530 | -2.44590 | -13.17440 |
| H | 0.39630  | -1.32600 | -13.87890 |
| H | 0.24360  | -0.44510 | -16.54460 |
| H | 1.64050  | 1.48130  | -15.74330 |
| H | 0.32550  | 1.04120  | -14.56870 |
| H | 2.03610  | 0.54260  | -14.23830 |
| H | 3.17230  | -1.51620 | -14.67100 |
| H | 5.11760  | -1.26300 | -16.68520 |
| H | 6.38750  | -2.96790 | -15.34920 |
| H | 5.60350  | -1.70750 | -14.30070 |
| H | 4.86530  | -3.35700 | -14.43600 |
| H | 3.09900  | -4.16610 | -15.82960 |
| H | 4.01900  | -5.95410 | -17.79490 |
| H | 1.80360  | -7.08950 | -17.46710 |
| H | 2.55770  | -6.57170 | -15.89670 |
| H | 1.19510  | -5.60970 | -16.60530 |
| H | 1.21590  | -3.64120 | -17.96230 |
| H | 0.36710  | -4.14630 | -20.59480 |
| H | -0.60270 | -1.83320 | -20.47810 |
| H | -0.87330 | -2.77760 | -18.94910 |
| H | 0.41340  | -1.50280 | -19.00800 |
| H | 2.76300  | -1.67560 | -19.41580 |
| H | 3.50720  | -0.55140 | -21.88310 |
| H | 5.62300  | 0.08540  | -20.69040 |
| H | 4.14310  | 0.35300  | -19.67000 |
| H | 5.20380  | -1.08420 | -19.36410 |
| H | 5.01890  | -3.34720 | -20.11320 |
| H | 7.02060  | -4.02890 | -21.96640 |
| H | 6.90040  | -6.30250 | -20.90800 |
| H | 6.83340  | -4.96190 | -19.68290 |
| H | 5.31730  | -5.84130 | -20.14380 |
| H | 3.61710  | -5.29210 | -21.73250 |
| H | 3.62210  | -7.02340 | -23.94800 |
| H | 1.13410  | -6.68660 | -23.92250 |
| H | 1.82280  | -6.90230 | -22.25460 |

SupplementaryData.txt

|   |          |          |           |
|---|----------|----------|-----------|
| H | 1.35990  | -5.24880 | -22.83410 |
| H | 2.68050  | -3.51210 | -23.81200 |
| H | 2.06890  | -3.10060 | -26.52530 |
| H | 2.57690  | -0.69120 | -26.03400 |
| H | 1.61020  | -1.48050 | -24.71290 |
| H | 3.38600  | -1.19780 | -24.48760 |
| H | 5.25230  | -2.65440 | -24.82190 |
| H | 6.83530  | -1.88100 | -27.01310 |
| H | 8.74950  | -2.74740 | -25.63840 |
| H | 7.55840  | -1.79620 | -24.64880 |
| H | 7.56250  | -3.60640 | -24.56320 |
| H | 6.23280  | -5.22560 | -25.71500 |
| H | 7.72800  | -6.71110 | -27.57590 |
| H | 6.19480  | -8.59860 | -26.95050 |
| H | 6.73110  | -7.63250 | -25.50770 |
| H | 5.06520  | -7.40010 | -26.18210 |
| H | 4.21560  | -5.77380 | -27.71510 |
| H | 3.54450  | -6.89620 | -30.20410 |
| H | 1.71160  | -5.18020 | -30.22160 |
| H | 1.91780  | -5.95930 | -28.59280 |
| H | 2.55960  | -4.28970 | -28.88350 |
| H | 4.75200  | -3.54250 | -29.47670 |
| H | 4.86400  | -2.52250 | -32.09450 |
| H | 6.57470  | -0.94200 | -31.15630 |
| H | 5.15950  | -1.17590 | -30.04040 |
| H | 6.73060  | -2.01010 | -29.69420 |
| H | 7.46640  | -4.22630 | -30.20780 |
| H | 9.49340  | -4.25710 | -32.15610 |
| H | 10.36630 | -6.23670 | -30.88180 |
| H | 9.80160  | -4.90030 | -29.78730 |
| H | 8.76670  | -6.36810 | -30.02930 |
| H | 6.92810  | -6.75400 | -31.50820 |
| H | 7.55730  | -8.58990 | -33.54270 |
| H | 5.15560  | -9.29120 | -33.33200 |
| H | 5.93940  | -9.00410 | -31.71770 |
| H | 4.81160  | -7.76470 | -32.40770 |
| H | 5.25590  | -5.77470 | -33.65640 |
| H | 4.41870  | -5.98040 | -36.33260 |
| H | 3.90590  | -3.53200 | -36.11660 |
| H | 3.40630  | -4.47830 | -34.64780 |
| H | 4.91440  | -3.47430 | -34.60590 |
| H | 7.20030  | -4.07720 | -34.96320 |
| H | 8.23160  | -3.00100 | -37.34720 |
| H | 10.38710 | -2.84180 | -36.06940 |
| H | 8.95100  | -2.34300 | -35.07360 |
| H | 9.70590  | -3.97060 | -34.81860 |
| H | 9.11780  | -6.11720 | -35.69220 |
| H | 10.44310 | -9.29640 | -38.75020 |
| H | 11.01570 | -7.08270 | -37.52830 |
| H | 10.42590 | -9.33840 | -36.59660 |
| H | 10.57380 | -8.07000 | -35.30350 |
| H | 8.93460  | -8.61760 | -35.84880 |
| H | 8.18490  | -8.69100 | -40.63490 |
| H | 9.79510  | -9.35240 | -41.16870 |
| H | 8.68540  | 10.37830 | -40.16860 |
| N | -3.71640 | 0.55200  | 0.79250   |
| N | -1.05150 | 1.07620  | -0.14070  |
| N | -0.41200 | -1.54840 | -1.11540  |
| N | -2.41280 | -1.74600 | -3.16600  |
| N | -1.54070 | 0.42620  | -4.82980  |
| N | 1.04960  | -0.58930 | -5.54180  |
| N | 0.21540  | -2.95140 | -6.94610  |
| N | -1.23770 | -1.69360 | -9.08010  |
| N | 0.93220  | -0.25110 | -10.28750 |
| N | 2.55820  | -2.48770 | -11.06270 |
| N | 0.73580  | -3.72820 | -12.90310 |
| N | 0.56410  | -1.60920 | -14.83390 |
| N | 3.31110  | -1.56470 | -15.67040 |

SupplementaryData.txt

|   |          |          |           |
|---|----------|----------|-----------|
| N | 3.47040  | -4.21380 | -16.76780 |
| N | 1.54170  | -3.92380 | -18.87570 |
| N | 2.87080  | -1.88370 | -20.39840 |
| N | 5.24230  | -3.34430 | -21.09840 |
| N | 4.02140  | -5.43150 | -22.64770 |
| N | 2.91120  | -3.81670 | -24.74710 |
| N | 5.35780  | -2.76370 | -25.82060 |
| N | 6.55210  | -5.23230 | -26.67330 |
| N | 4.59150  | -6.00880 | -28.62280 |
| N | 4.89590  | -3.80680 | -30.44100 |
| N | 7.62820  | -4.25290 | -31.20460 |
| N | 7.31610  | -6.82750 | -32.43800 |
| N | 5.55340  | -6.07090 | -34.57520 |
| N | 7.30060  | -4.25500 | -35.95250 |
| N | 9.37190  | -6.11030 | -36.66990 |
| N | 9.64690  | -8.81000 | -39.13460 |
| O | -5.66860 | 1.42350  | 1.54160   |
| O | -2.10740 | 1.19170  | -2.18120  |
| O | 0.65560  | -0.35220 | -2.76490  |
| O | -0.72390 | -2.82450 | -4.29580  |
| O | -2.17470 | -1.00280 | -6.51740  |
| O | 0.53980  | 0.36890  | -7.57010  |
| O | 1.98880  | -2.40880 | -8.30730  |
| O | -0.32150 | -3.40480 | -10.31460 |
| O | -0.15950 | -0.82320 | -12.22980 |
| O | 2.96820  | -1.17170 | -12.90440 |
| O | 2.67160  | -4.15730 | -14.06940 |
| O | 0.50850  | -3.36630 | -16.31750 |
| O | 2.36870  | -1.15050 | -17.72760 |
| O | 4.80410  | -3.16850 | -18.32350 |
| O | 3.03160  | -5.25250 | -20.01880 |
| O | 2.03450  | -3.08140 | -22.17540 |
| O | 4.99650  | -2.21010 | -23.08460 |
| O | 5.91220  | -5.17670 | -23.93280 |
| O | 3.52570  | -5.61160 | -26.04810 |
| O | 4.24540  | -3.02130 | -27.81760 |
| O | 7.27030  | -3.93360 | -28.43100 |
| O | 6.44910  | -6.74700 | -29.76130 |
| O | 4.55720  | -5.44740 | -32.01760 |
| O | 6.85500  | -3.56700 | -33.25970 |
| O | 8.87880  | -5.98600 | -33.90150 |
| O | 6.80070  | -7.60580 | -35.75000 |
| O | 6.31330  | -5.18270 | -37.81160 |
| O | 9.41720  | -4.85650 | -38.59800 |
| O | 8.23030  | -7.05800 | -38.90930 |

Table 3: Cartesian coordinates of the water cluster (Angstrom).

| Atom | x        | y        | z        |
|------|----------|----------|----------|
| O    | -1.92649 | 0.41885  | 0.30394  |
| O    | 1.19668  | -0.04145 | 0.42587  |
| O    | 0.10501  | 1.02169  | -2.02618 |
| O    | -0.69563 | -1.79961 | -1.40220 |
| O    | 1.71889  | -0.49832 | 3.40046  |
| O    | -2.90867 | 0.43623  | -2.34864 |
| O    | -0.71898 | -2.03672 | 1.58354  |
| O    | 0.09643  | 2.56985  | 1.21862  |
| O    | -2.87031 | 2.81360  | 1.77031  |
| O    | -3.68432 | -0.90139 | 2.38297  |
| O    | -1.03513 | 0.53650  | 3.06838  |
| O    | -2.33220 | -0.18777 | -5.29366 |
| O    | 2.14296  | -1.47302 | -2.09524 |
| O    | 3.00742  | 1.68503  | -1.26838 |
| O    | 1.04499  | -4.28818 | -0.91614 |

SupplementaryData.txt

|   |          |          |          |
|---|----------|----------|----------|
| O | -2.46799 | -2.87637 | 4.17314  |
| O | -3.60449 | -2.02869 | -0.55900 |
| O | 0.09771  | -5.02625 | 1.83533  |
| O | -1.82660 | 3.19850  | -1.23096 |
| O | 4.04479  | 2.32811  | 1.29971  |
| O | -0.50169 | 2.04744  | -4.77630 |
| O | 0.62030  | -3.01734 | 4.16721  |
| O | 1.03641  | 3.91377  | -1.31397 |
| O | -0.05917 | 4.74395  | 3.30585  |
| O | -2.83116 | -4.07081 | 1.42368  |
| O | -1.95301 | -4.59576 | -1.42835 |
| O | 4.42582  | 0.55234  | 3.78459  |
| O | -3.64697 | 0.54645  | 4.89899  |
| O | 0.34718  | -0.90354 | -4.48374 |
| O | -0.87243 | -0.74261 | 5.71285  |
| O | 4.08936  | -0.73356 | 1.06414  |
| O | 4.47484  | -0.63613 | -3.88752 |
| O | 5.54620  | 0.10720  | -1.36956 |
| O | -5.99617 | 0.40549  | -1.90442 |
| O | -3.14909 | 2.78790  | -4.08193 |
| O | -0.03565 | -3.72767 | -3.63321 |
| O | -4.91873 | 1.10084  | 0.65651  |
| O | -4.87902 | -4.98060 | -0.73006 |
| O | 2.03245  | 2.48733  | 3.55750  |
| O | -2.87841 | -2.50202 | -3.51261 |
| O | -3.37965 | -1.72519 | 6.87633  |
| O | -1.90347 | 3.01107  | 4.66089  |
| O | 2.62625  | -5.15843 | 3.79164  |
| O | 3.98989  | -2.51678 | 3.68131  |
| O | -5.77826 | -2.57671 | -2.48894 |
| O | 2.38366  | 1.57586  | -4.02819 |
| O | 2.27634  | 4.63515  | 1.34743  |
| O | 2.14566  | -2.86754 | 1.33590  |
| O | 2.55471  | -0.29343 | -6.31312 |
| O | 2.74232  | -2.95766 | -4.73880 |
| O | -5.05301 | -0.38069 | -4.44543 |
| H | -2.36868 | 0.50264  | 1.13163  |
| H | -1.06528 | 0.74780  | 0.49737  |
| H | 0.89711  | -0.40740 | -0.38900 |
| H | 1.34550  | 0.86093  | 0.19837  |
| H | 0.50962  | 1.59451  | -2.65556 |
| H | -0.31153 | 0.37282  | -2.56840 |
| H | -0.56254 | -2.70217 | -1.16686 |
| H | -1.15946 | -1.45903 | -0.65616 |
| H | 2.01446  | -0.42500 | 2.50883  |
| H | 2.52319  | -0.55746 | 3.88747  |
| H | -2.73690 | -0.33092 | -1.82903 |
| H | -2.49669 | 1.11492  | -1.84132 |
| H | -0.26540 | -1.23104 | 1.76743  |
| H | -1.61073 | -1.83078 | 1.80740  |
| H | -0.61053 | 3.04711  | 1.61866  |
| H | 0.36054  | 1.98011  | 1.90516  |
| H | -3.72085 | 2.45272  | 1.95485  |
| H | -2.87204 | 2.87619  | 0.82986  |
| H | -4.41784 | -0.32146 | 2.49877  |
| H | -3.23889 | -0.84575 | 3.21144  |
| H | -0.41106 | 0.34990  | 3.74908  |
| H | -1.69221 | 1.04595  | 3.51140  |
| H | -2.14169 | -1.11063 | -5.32154 |
| H | -2.03115 | 0.05675  | -4.43400 |
| H | 1.83425  | -2.34312 | -1.90657 |
| H | 1.37756  | -1.05337 | -2.45157 |
| H | 2.83559  | 2.39208  | -1.86782 |
| H | 2.75778  | 0.92910  | -1.77325 |
| H | 0.42812  | -4.78525 | -0.40541 |
| H | 0.88285  | -4.58099 | -1.79665 |
| H | -1.62708 | -3.26447 | 4.00101  |
| H | -2.96070 | -3.08065 | 3.39654  |

SupplementaryData.txt

|   |          |          |          |
|---|----------|----------|----------|
| H | -3.48869 | -2.96021 | -0.47581 |
| H | -3.53704 | -1.73405 | 0.33294  |
| H | 0.75992  | -5.36144 | 2.41528  |
| H | 0.02115  | -4.12381 | 2.09595  |
| H | -1.17391 | 2.57602  | -0.95615 |
| H | -1.31212 | 3.95569  | -1.45393 |
| H | 3.70730  | 1.51126  | 0.97267  |
| H | 3.97965  | 2.89776  | 0.55177  |
| H | -0.85197 | 2.75342  | -4.25932 |
| H | -1.17776 | 1.91103  | -5.41889 |
| H | 0.84254  | -2.56742 | 3.36902  |
| H | 0.52220  | -2.30801 | 4.77973  |
| H | 1.05873  | 3.21798  | -0.67843 |
| H | 1.36061  | 4.65420  | -0.82952 |
| H | 0.16378  | 5.30850  | 2.58523  |
| H | 0.75911  | 4.33298  | 3.52708  |
| H | -1.99646 | -4.28612 | 1.04190  |
| H | -3.40489 | -4.73170 | 1.07518  |
| H | -1.65993 | -4.57136 | -2.32366 |
| H | -2.74944 | -5.09721 | -1.46961 |
| H | 4.85032  | -0.27889 | 3.91529  |
| H | 4.73577  | 0.82828  | 2.93838  |
| H | -3.33766 | 1.39731  | 5.15858  |
| H | -3.91660 | 0.15055  | 5.71013  |
| H | 0.25170  | -0.13156 | -5.01585 |
| H | 1.17110  | -1.25436 | -4.77669 |
| H | -1.61967 | -0.98300 | 5.19046  |
| H | -1.20889 | -0.78065 | 6.59199  |
| H | 4.11852  | -1.53185 | 1.56374  |
| H | 3.36435  | -0.87772 | 0.47896  |
| H | 5.36733  | -0.42488 | -3.67138 |
| H | 4.05095  | -0.59495 | -3.04615 |
| H | 5.19230  | 0.94183  | -1.11239 |
| H | 5.62799  | -0.35209 | -0.55128 |
| H | -5.13608 | 0.47545  | -2.28281 |
| H | -6.55999 | 0.47937  | -2.65564 |
| H | -3.19087 | 2.92811  | -3.15101 |
| H | -3.51511 | 1.92645  | -4.19412 |
| H | 0.62175  | -3.58735 | -4.29259 |
| H | -0.52727 | -2.92332 | -3.65103 |
| H | -5.70457 | 1.26199  | 0.16290  |
| H | -4.47494 | 0.44918  | 0.13960  |
| H | -5.35684 | -4.29006 | -1.15685 |
| H | -5.49013 | -5.69740 | -0.72227 |
| H | 1.77327  | 1.72442  | 4.04573  |
| H | 2.95438  | 2.34503  | 3.42264  |
| H | -3.73052 | -2.86403 | -3.33923 |
| H | -2.54284 | -2.31713 | -2.65162 |
| H | -3.54438 | -2.34308 | 7.56762  |
| H | -3.36871 | -2.25697 | 6.09847  |
| H | -2.09708 | 3.33196  | 3.79610  |
| H | -1.25086 | 3.61963  | 4.96276  |
| H | 2.05089  | -4.71025 | 4.38863  |
| H | 2.81746  | -5.97272 | 4.22484  |
| H | 4.36401  | -3.35379 | 3.89810  |
| H | 3.14287  | -2.74952 | 3.33927  |
| H | -6.12402 | -2.08270 | -3.21292 |
| H | -5.58007 | -1.91284 | -1.84958 |
| H | 3.02973  | 1.06844  | -4.48919 |
| H | 1.77540  | 1.81258  | -4.70756 |
| H | 3.02636  | 4.76390  | 1.90309  |
| H | 1.96608  | 3.78115  | 1.59913  |
| H | 1.47967  | -2.51892 | 0.76741  |
| H | 2.22262  | -3.76212 | 1.05000  |
| H | 3.21827  | -0.77605 | -5.84882 |
| H | 2.53159  | -0.70341 | -7.16060 |
| H | 3.13480  | -2.42947 | -4.06398 |
| H | 3.38390  | -3.63061 | -4.88946 |

SupplementaryData.txt

|   |          |          |          |
|---|----------|----------|----------|
| H | -4.21351 | -0.60715 | -4.08111 |
| H | -4.85181 | -0.23649 | -5.35432 |

Table 4: Cartesian coordinates of insulin (Angstrom).

| Atom | x        | y        | z        |
|------|----------|----------|----------|
| C    | 0.03300  | 22.18400 | 14.19400 |
| C    | 0.11500  | 20.61100 | 14.05700 |
| C    | 0.40400  | 5.92400  | 4.31200  |
| C    | 0.99000  | 20.37300 | 15.27700 |
| C    | -0.79500 | 6.52800  | 4.98300  |
| C    | -1.03200 | 7.33900  | 8.70500  |
| C    | -1.42100 | 7.28000  | 7.23900  |
| C    | -1.50400 | 16.50900 | 8.54300  |
| C    | -1.52400 | 14.05200 | 5.99500  |
| C    | -1.73000 | 19.01000 | 13.52400 |
| C    | -2.04200 | 14.72000 | 4.88600  |
| C    | -2.09800 | 0.43900  | 5.66600  |
| C    | -2.12300 | 5.93400  | 4.64500  |
| C    | -2.15100 | 16.22400 | 9.88800  |
| C    | -2.24900 | 2.00800  | 7.21400  |
| C    | -2.31200 | 13.12100 | 6.61900  |
| C    | -2.38500 | 17.38800 | 7.69700  |
| C    | -2.81200 | 10.71200 | 3.17200  |
| C    | -2.82300 | 9.74000  | 0.82400  |
| C    | -2.93500 | 5.93200  | 9.44500  |
| C    | -3.07300 | 3.83500  | -0.69400 |
| C    | -3.09400 | 9.52700  | 2.28200  |
| C    | -3.19600 | 2.20800  | 6.29100  |
| C    | -3.23200 | 18.92600 | 13.22800 |
| C    | -3.32500 | 18.20300 | 10.91300 |
| C    | -3.34000 | 14.49300 | 4.38100  |
| C    | -3.36400 | 4.49100  | 0.66000  |
| C    | -3.41900 | 5.18300  | 11.80600 |
| C    | -3.42600 | 17.04000 | 9.94700  |
| C    | -3.61800 | 12.91100 | 6.18700  |
| C    | -3.82400 | 19.21600 | 15.71000 |
| C    | -3.93000 | 4.38700  | 5.22400  |
| C    | -3.94900 | 15.25500 | 3.27600  |
| C    | -3.99300 | 5.82500  | 10.55400 |
| C    | -4.00800 | 18.42900 | 14.43400 |
| C    | -4.15300 | 13.61000 | 5.11800  |
| C    | -4.22400 | 3.30000  | 6.21400  |
| C    | -4.37600 | 13.01700 | 10.27000 |
| C    | -4.45400 | 17.36000 | 4.72600  |
| C    | -4.57000 | 9.09200  | 2.44000  |
| C    | -4.73800 | 18.06300 | 8.20400  |
| C    | -4.73900 | 18.65200 | 17.97200 |
| C    | -4.76600 | 18.58700 | 6.75500  |
| C    | -4.89700 | 4.48700  | 0.92300  |
| C    | -4.95700 | 16.30800 | 3.74900  |
| C    | -5.03800 | 8.16200  | 1.35900  |
| C    | -5.08900 | 18.94800 | 16.50900 |
| C    | -5.12700 | 5.36100  | 5.10400  |
| C    | -5.15200 | 20.75000 | 5.63100  |
| C    | -5.37900 | 12.42800 | -1.04600 |
| C    | -5.41700 | 5.87700  | 0.53800  |
| C    | -5.49700 | 14.52200 | 14.90300 |
| C    | -5.54200 | 22.66000 | -0.05300 |
| C    | -5.56500 | 7.84100  | 13.61600 |
| C    | -5.57800 | 13.34300 | 0.00300  |
| C    | -5.57900 | 19.89700 | 6.82000  |
| C    | -5.60300 | 15.40700 | 13.66800 |
| C    | -5.74000 | 13.73100 | 10.28200 |



SupplementaryData.txt

|   |          |          |          |
|---|----------|----------|----------|
| C | -5.82800 | 21.60100 | 0.81900  |
| C | -5.84600 | 14.47200 | 8.94900  |
| C | -5.86700 | 8.94400  | -6.68000 |
| C | -5.93900 | 8.60400  | 6.67000  |
| C | -5.95500 | 9.16900  | -5.26200 |
| C | -5.97800 | 8.20400  | 4.23700  |
| C | -6.07200 | 7.68300  | -7.14500 |
| C | -6.10800 | 7.53600  | 5.62000  |
| C | -6.27900 | 8.10400  | -4.48200 |
| C | -6.30000 | 12.38100 | -2.10400 |
| C | -6.33200 | 22.84600 | -1.20400 |
| C | -6.36700 | 6.60900  | -6.32800 |
| C | -6.38800 | 5.64600  | 10.12300 |
| C | -6.42200 | 9.79900  | 18.16200 |
| C | -6.47000 | 6.82800  | -4.94300 |
| C | -6.53900 | 8.24900  | -2.96400 |
| C | -6.59200 | 17.34800 | 2.28400  |
| C | -6.67000 | 14.17700 | 0.00800  |
| C | -6.72600 | 13.66700 | 15.27300 |
| C | -6.76900 | 18.28800 | 1.05700  |
| C | -6.83100 | 10.39300 | 8.04700  |
| C | -6.89900 | 12.46500 | 14.32700 |
| C | -6.90600 | 5.96800  | 0.49300  |
| C | -6.91100 | 20.77200 | 0.51700  |
| C | -6.92300 | 12.19800 | 11.91500 |
| C | -6.98200 | 7.25700  | 13.79500 |
| C | -6.98600 | 9.68400  | 6.70400  |
| C | -6.99600 | 12.91600 | 10.55500 |
| C | -7.20400 | 2.11000  | 15.15200 |
| C | -7.24600 | 19.66000 | 1.49000  |
| C | -7.25000 | 7.05100  | 15.29800 |
| C | -7.36100 | 21.96300 | -1.52100 |
| C | -7.42800 | 13.23600 | -2.06200 |
| C | -7.44200 | 17.13900 | -1.06200 |
| C | -7.47500 | 4.77100  | 9.58600  |
| C | -7.60900 | 14.13800 | -1.00700 |
| C | -7.66500 | 20.96600 | -0.64600 |
| C | -7.66900 | 12.32200 | 3.19700  |
| C | -7.73700 | 9.10400  | 18.36000 |
| C | -7.82000 | 7.82600  | 17.48300 |
| C | -7.85400 | 8.99300  | -2.70400 |
| C | -8.05300 | 11.55700 | 14.66100 |
| C | -8.28600 | 5.41900  | 8.41200  |
| C | -8.35900 | 10.90200 | 1.33700  |
| C | -8.40300 | 3.70500  | 14.32500 |
| C | -8.42700 | 9.30100  | 6.53300  |
| C | -8.53700 | 16.33300 | -1.71000 |
| C | -8.77900 | 3.62200  | 6.60200  |
| C | -8.81100 | 11.50200 | 2.65800  |
| C | -8.81300 | 15.00000 | -1.07100 |
| C | -8.81800 | 15.70300 | -5.44800 |
| C | -8.83900 | 2.51700  | 13.87100 |
| C | -8.85800 | 3.23000  | 10.87100 |
| C | -8.99200 | 8.19100  | -3.33700 |
| C | -9.09100 | 6.14300  | 1.72500  |
| C | -9.10400 | 7.05000  | 17.77100 |
| C | -9.11600 | 7.53500  | 12.64800 |
| C | -9.15500 | 3.28600  | -1.70000 |
| C | -9.21200 | 9.81800  | -0.83100 |
| C | -9.29900 | 9.87300  | 0.72600  |
| C | -9.35100 | 4.61900  | 7.56700  |
| C | -9.35300 | 13.27700 | 10.72900 |
| C | -9.38100 | 15.92200 | -3.99000 |
| C | -9.56300 | 7.42900  | 1.00800  |
| C | -9.59400 | 4.19300  | -2.80200 |
| C | -9.64300 | 8.66300  | 10.53000 |
| C | -9.65400 | 6.06200  | 3.10500  |
| C | -9.83300 | 14.69000 | 8.32100  |

SupplementaryData.txt

|   |           |          |           |
|---|-----------|----------|-----------|
| C | -9.92200  | 17.11800 | 13.16500  |
| C | -9.93800  | 2.10100  | 12.92100  |
| C | -10.03500 | 20.25100 | -4.41700  |
| C | -10.06000 | 3.06400  | 11.78100  |
| C | -10.07000 | 15.70800 | 12.61900  |
| C | -10.09300 | 5.62600  | 6.77300   |
| C | -10.09300 | 8.53100  | 12.01500  |
| C | -10.11200 | 3.48000  | -4.03400  |
| C | -10.13400 | 12.26000 | 2.60500   |
| C | -10.35100 | 11.73000 | -7.57300  |
| C | -10.48200 | 13.02200 | -9.70400  |
| C | -10.49700 | 9.90500  | 14.02200  |
| C | -10.50800 | 11.33400 | 14.62200  |
| C | -10.53200 | 14.24100 | 10.70700  |
| C | -10.59300 | 6.32800  | -3.17100  |
| C | -10.69300 | 5.09900  | -2.26100  |
| C | -10.82900 | 14.38500 | -9.17300  |
| C | -10.83900 | 10.43000 | -6.92100  |
| C | -10.84300 | 17.25100 | 5.06900   |
| C | -10.86500 | 16.11600 | -6.72100  |
| C | -10.99100 | 14.33700 | 9.27500   |
| C | -11.10000 | 12.69400 | -11.05000 |
| C | -11.16000 | 17.76500 | 6.35600   |
| C | -11.31200 | 19.51100 | -4.64200  |
| C | -11.35900 | 15.73300 | 3.11800   |
| C | -11.43700 | 6.76700  | 17.08600  |
| C | -11.54500 | 16.15300 | 4.55700   |
| C | -11.58500 | 12.76800 | -3.07900  |
| C | -11.70400 | 13.00500 | 9.02500   |
| C | -11.70600 | 12.13900 | 14.14900  |
| C | -11.76200 | 5.95800  | 15.87100  |
| C | -11.91700 | 7.05700  | -3.25600  |
| C | -12.04000 | 10.61100 | 6.05800   |
| C | -12.08100 | 15.58700 | -7.47100  |
| C | -12.08400 | 16.74600 | 0.90800   |
| C | -12.09800 | 11.51700 | -5.23500  |
| C | -12.10200 | 8.52100  | 4.63300   |
| C | -12.13700 | 17.11400 | 7.13500   |
| C | -12.15700 | 3.12600  | 10.63900  |
| C | -12.28200 | 7.99300  | 17.37100  |
| C | -12.33100 | 19.30500 | -3.56800  |
| C | -12.34900 | 16.70000 | 2.41000   |
| C | -12.45800 | 11.74200 | -3.78000  |
| C | -12.50200 | 2.64100  | 8.24400   |
| C | -12.55000 | 15.58800 | 5.32100   |
| C | -12.55900 | 12.29500 | -11.18200 |
| C | -12.60500 | 0.45500  | 6.71500   |
| C | -12.79000 | 16.28400 | -1.32600  |
| C | -12.83400 | 16.02700 | 6.63800   |
| C | -12.85800 | 17.71700 | -1.84400  |
| C | -12.86100 | 9.69500  | 5.15100   |
| C | -12.89800 | 11.11400 | -12.05300 |
| C | -12.94900 | 11.28900 | 14.51400  |
| C | -12.97000 | 13.01800 | 9.88500   |
| C | -13.08300 | 1.85000  | 7.05600   |
| C | -13.11200 | 2.46300  | 9.67900   |
| C | -13.25900 | 15.62700 | -6.48700  |
| C | -13.35600 | 5.70900  | 13.96600  |
| C | -13.41600 | 8.53800  | -1.93600  |
| C | -13.46100 | 9.70000  | -2.83100  |
| C | -13.50600 | 10.40200 | 3.93400   |
| C | -13.59100 | 8.99300  | -0.43100  |
| C | -13.61000 | 8.66900  | 10.59100  |
| C | -13.68300 | 19.68700 | -4.17400  |
| C | -13.74700 | 15.46800 | -2.13100  |
| C | -13.84600 | 7.67400  | 0.23000   |
| C | -13.89700 | 6.88000  | 13.09600  |
| C | -13.93200 | 3.38900  | 14.69000  |

SupplementaryData.txt

|   |           |          |          |
|---|-----------|----------|----------|
| C | -14.05400 | 11.64300 | 13.55400 |
| C | -14.12200 | 11.71300 | 4.41900  |
| C | -14.42100 | 4.60800  | 13.95600 |
| C | -14.49300 | 12.58000 | 3.22600  |
| C | -14.60700 | 5.23900  | 3.85600  |
| C | -14.64000 | 15.00400 | -6.70900 |
| C | -14.64900 | 7.64600  | 10.90200 |
| C | -14.74900 | 17.12000 | 3.01400  |
| C | -14.83800 | 9.89800  | -0.30700 |
| C | -15.31100 | 6.91800  | 9.73300  |
| C | -15.47000 | 2.14000  | 9.85300  |
| C | -15.65900 | 5.05600  | 14.70000 |
| C | -15.78600 | 15.08700 | -5.75300 |
| C | -15.95400 | 12.49900 | 5.89000  |
| C | -16.01100 | 5.13300  | 3.35500  |
| C | -16.05900 | 4.26100  | 2.11000  |
| C | -16.09600 | 16.53600 | 3.41100  |
| C | -16.17300 | 14.69500 | 1.86000  |
| C | -16.18700 | 13.19600 | 1.59800  |
| C | -16.47500 | 7.45200  | 4.28400  |
| C | -16.56100 | 7.73300  | 6.67600  |
| C | -16.59100 | 16.89000 | 4.79200  |
| C | -16.61700 | 16.77800 | -4.16400 |
| C | -16.73700 | 6.45000  | 3.15600  |
| C | -16.81800 | 11.77700 | 8.17000  |
| C | -16.83500 | 4.12700  | 15.01400 |
| C | -16.85100 | 2.80200  | 9.87500  |
| C | -16.89300 | -0.87400 | 6.91800  |
| C | -16.98800 | 7.00600  | 7.99800  |
| C | -17.19300 | 12.15600 | 6.74200  |
| C | -17.22700 | 2.94500  | 11.32500 |
| C | -17.29000 | 8.70900  | 4.08900  |
| C | -17.56900 | 11.04900 | 10.53700 |
| C | -17.62400 | 12.98800 | 1.21600  |
| C | -17.82700 | 1.64200  | 7.95800  |
| C | -17.84800 | 11.66200 | 0.46900  |
| C | -17.88800 | 11.75900 | 9.24700  |
| C | -17.95600 | 16.27400 | 5.20900  |
| C | -18.15700 | -0.84900 | 7.72500  |
| C | -18.46200 | 7.23500  | 8.23600  |
| C | -18.48400 | 3.74100  | 11.51500 |
| C | -18.62900 | 11.23400 | 4.94400  |
| C | -18.79400 | 0.53700  | 7.52900  |
| C | -19.15900 | 11.74400 | -0.28700 |
| C | -19.28600 | 9.98100  | 4.37300  |
| C | -19.33800 | -1.81600 | 7.60500  |
| C | -19.72100 | 1.78400  | 1.38400  |
| C | -19.80500 | 2.70100  | 3.67600  |
| C | -19.83500 | 1.90500  | -0.01300 |
| C | -19.91700 | 2.87600  | 2.19800  |
| C | -20.05400 | 3.14400  | -0.57800 |
| C | -20.13100 | 4.11300  | 1.62400  |
| C | -20.17300 | 4.29900  | 0.22600  |
| C | -20.19700 | 1.03300  | 5.58800  |
| C | -20.19900 | 1.29600  | 4.07900  |
| C | -20.71300 | 9.78000  | 4.97700  |
| C | -21.41900 | 7.36500  | 4.56600  |
| C | -21.43200 | 8.71100  | 4.21400  |
| C | -22.05800 | 6.38800  | 3.78200  |
| C | -22.06100 | 9.07400  | 3.00100  |
| C | -22.73900 | 8.12600  | 2.22800  |
| C | -22.74100 | 6.79000  | 2.68700  |
| H | 0.30300   | 5.90600  | 3.22400  |
| H | 0.32370   | 6.09080  | 6.78530  |
| H | 0.63600   | 20.44200 | 13.12800 |
| H | 1.01100   | 22.46900 | 14.58700 |
| H | 1.32700   | 6.43600  | 4.59000  |
| H | 1.33730   | 4.03660  | 4.53050  |

SupplementaryData.txt

|   |          |          |          |
|---|----------|----------|----------|
| H | 2.50880  | 19.80400 | 16.13640 |
| H | -0.10000 | 22.46400 | 13.17400 |
| H | -0.25300 | 6.66500  | 8.93300  |
| H | -0.49400 | 14.19700 | 6.30700  |
| H | -0.52700 | 16.94900 | 8.62700  |
| H | -0.68300 | 7.59800  | 4.88100  |
| H | -0.72700 | 22.39500 | 14.89400 |
| H | -0.88200 | 8.32900  | 9.09200  |
| H | -1.00880 | 11.87470 | 7.67350  |
| H | -1.38700 | 15.67800 | 8.14100  |
| H | -1.40100 | 15.41000 | 4.34700  |
| H | -1.46900 | 16.42900 | 10.66700 |
| H | -1.74200 | -0.36600 | 5.04400  |
| H | -1.86000 | 11.13600 | 2.96300  |
| H | -1.92180 | 21.08910 | 13.81220 |
| H | -1.96200 | 2.42200  | 8.14700  |
| H | -2.01000 | 10.37300 | 0.51700  |
| H | -2.02410 | 4.84670  | 6.33130  |
| H | -2.08700 | 18.37000 | 7.42900  |
| H | -2.23440 | 7.69550  | 10.41180 |
| H | -2.26800 | 15.23800 | 10.01600 |
| H | -2.63300 | 8.57700  | 2.61800  |
| H | -2.72300 | 5.94500  | 12.22600 |
| H | -2.77600 | 16.82800 | 6.84900  |
| H | -2.79100 | 8.81500  | 0.26700  |
| H | -2.81690 | 19.24890 | 18.52380 |
| H | -2.85200 | 4.31700  | 11.77700 |
| H | -2.92400 | 5.44200  | 0.52400  |
| H | -2.92500 | 18.89800 | 16.25600 |
| H | -2.92800 | 3.86100  | 1.37700  |
| H | -3.00800 | 10.76600 | 4.23800  |
| H | -3.30900 | 15.72100 | 2.51100  |
| H | -3.46800 | 11.47900 | 2.68600  |
| H | -3.52300 | 19.85300 | 12.86200 |
| H | -3.56400 | 17.41900 | 14.53000 |
| H | -3.61790 | 20.38950 | 17.49600 |
| H | -3.65900 | 10.28500 | 0.34300  |
| H | -3.66750 | 16.88260 | 12.51520 |
| H | -3.67100 | 13.71600 | 10.69400 |
| H | -3.69730 | 1.15280  | 4.46980  |
| H | -3.73800 | 20.28700 | 15.53000 |
| H | -3.78600 | 4.03700  | 4.20300  |
| H | -3.81300 | 18.96100 | 6.42100  |
| H | -3.85310 | 8.28030  | 4.32120  |
| H | -4.01200 | 3.87700  | 7.19100  |
| H | -4.05580 | 20.17430 | 19.22100 |
| H | -4.10100 | 20.53200 | 5.45900  |
| H | -4.13200 | 12.97800 | 9.21200  |
| H | -4.19300 | 6.87000  | 10.69700 |
| H | -4.22450 | 6.70670  | 6.34190  |
| H | -4.23300 | 16.49900 | 10.32500 |
| H | -4.23600 | 12.20200 | 6.74100  |
| H | -4.24000 | 17.69800 | 17.93000 |
| H | -4.35800 | 12.04400 | 10.66600 |
| H | -4.51040 | 6.43880  | 2.35430  |
| H | -4.52100 | 14.48700 | 2.67600  |
| H | -4.55010 | 17.74280 | 2.24360  |
| H | -4.58800 | 11.74300 | -1.08200 |
| H | -4.75300 | 13.78000 | 14.55100 |
| H | -4.77800 | 23.29200 | 0.13900  |
| H | -4.83900 | 14.90200 | 8.83200  |
| H | -4.88700 | 4.21300  | 1.96300  |
| H | -4.88700 | 13.28100 | 0.76100  |
| H | -4.91200 | 4.11270  | 9.79260  |
| H | -4.93000 | 9.09000  | 6.83700  |
| H | -5.01900 | 10.04900 | 2.60500  |
| H | -5.02800 | 6.08300  | -0.44900 |
| H | -5.06100 | 18.36300 | 14.13200 |

SupplementaryData.txt

|   |          |          |          |
|---|----------|----------|----------|
| H | -5.11200 | 14.94500 | 15.79400 |
| H | -5.16200 | 13.44000 | 4.78300  |
| H | -5.22100 | 2.94600  | 6.34500  |
| H | -5.22770 | 7.85470  | -9.09660 |
| H | -5.24200 | 3.71100  | 0.27900  |
| H | -5.26800 | 21.80900 | 5.82100  |
| H | -5.30800 | 21.44900 | 1.71400  |
| H | -5.35700 | 20.38500 | 7.80400  |
| H | -5.40400 | 7.92200  | 12.54100 |
| H | -5.50100 | 9.74300  | -7.32600 |
| H | -5.50900 | 8.74400  | 14.17600 |
| H | -5.61100 | 18.05400 | 16.14300 |
| H | -5.63600 | 18.75300 | 18.54200 |
| H | -5.67600 | 9.08300  | 17.74900 |
| H | -5.70500 | 14.49500 | 11.07300 |
| H | -5.71300 | 8.44000  | -2.36700 |
| H | -5.74100 | 20.43200 | 4.74600  |
| H | -5.76400 | 10.44600 | 8.27200  |
| H | -5.77000 | 19.77600 | 16.50700 |
| H | -5.79400 | 18.44000 | 0.65800  |
| H | -5.80600 | 10.16800 | -4.89900 |
| H | -5.81500 | 15.77900 | 4.15800  |
| H | -5.96200 | 8.07100  | 7.66200  |
| H | -5.97800 | 11.93100 | 14.29200 |
| H | -5.98400 | 13.79500 | 8.14000  |
| H | -6.00900 | 10.20300 | 19.06200 |
| H | -6.06900 | 23.58900 | -1.91400 |
| H | -6.07120 | 16.95630 | 6.02090  |
| H | -6.23700 | 11.72800 | -2.90600 |
| H | -6.43300 | 13.29100 | 16.23000 |
| H | -6.46900 | 10.53600 | 17.31500 |
| H | -6.47500 | 1.54600  | 15.73900 |
| H | -6.53300 | 5.60000  | -6.69300 |
| H | -6.56200 | 15.23700 | 9.03500  |
| H | -6.68200 | 19.92900 | 2.38000  |
| H | -6.71400 | 7.14300  | -2.80800 |
| H | -6.72000 | 11.83000 | 3.15900  |
| H | -6.80900 | 10.43700 | 5.90300  |
| H | -6.82400 | 6.01500  | -4.28100 |
| H | -6.85200 | 6.27800  | 13.37000 |
| H | -6.89200 | 14.83900 | 0.83000  |
| H | -6.99000 | 7.24500  | 17.84400 |
| H | -7.04600 | 3.87600  | 9.16400  |
| H | -7.07000 | 12.16300 | 9.79000  |
| H | -7.07840 | 5.89780  | 2.49830  |
| H | -7.12800 | 7.11300  | 5.63500  |
| H | -7.19800 | 11.41700 | 7.97000  |
| H | -7.21610 | 14.08410 | 12.95170 |
| H | -7.29300 | 10.76100 | 1.30100  |
| H | -7.30400 | 9.80600  | 8.82000  |
| H | -7.35170 | 15.94160 | -3.55340 |
| H | -7.45170 | 20.52160 | 6.51920  |
| H | -7.48080 | 8.75580  | -0.60290 |
| H | -7.59400 | 14.31100 | 15.20100 |
| H | -7.59700 | 5.77100  | 7.65700  |
| H | -7.74930 | 9.05380  | 15.63140 |
| H | -7.76000 | 12.00700 | 4.29900  |
| H | -7.76600 | 9.92000  | -3.26300 |
| H | -7.77070 | 9.10160  | 13.09730 |
| H | -7.83200 | 13.36000 | 3.11400  |
| H | -7.88900 | 8.74400  | 19.40400 |
| H | -7.89200 | 3.05300  | 6.76600  |
| H | -7.92900 | 22.11000 | -2.39300 |
| H | -8.04770 | 14.82100 | 10.32300 |
| H | -8.08340 | 8.55940  | 1.88540  |
| H | -8.10700 | 14.93200 | -5.21000 |
| H | -8.11500 | 13.20300 | -2.82700 |
| H | -8.12070 | 16.28290 | 13.83380 |

SupplementaryData.txt

|   |           |          |           |
|---|-----------|----------|-----------|
| H | -8.13790  | 0.47500  | 14.22040  |
| H | -8.16460  | 20.22270 | -3.41850  |
| H | -8.23800  | 4.42500  | 5.91200   |
| H | -8.24900  | 2.81500  | -2.02900  |
| H | -8.26600  | 19.63400 | 1.75600   |
| H | -8.30000  | 16.59500 | -5.72500  |
| H | -8.43100  | 20.28700 | -0.80100  |
| H | -8.51100  | 11.77600 | 0.62300   |
| H | -8.52990  | 17.87130 | 14.64020  |
| H | -8.53600  | 9.14000  | 5.43500   |
| H | -8.54080  | 17.23110 | 0.72270   |
| H | -8.70000  | 8.41600  | 7.09400   |
| H | -8.75100  | 9.29600  | 10.48600  |
| H | -8.75400  | 4.70100  | 14.16400  |
| H | -8.79600  | 4.86300  | -3.14400  |
| H | -8.87200  | 6.14100  | 3.91600   |
| H | -8.92400  | 14.35300 | 8.82000   |
| H | -8.98300  | 3.76000  | -0.73400  |
| H | -8.99200  | 6.11500  | 8.84500   |
| H | -8.99600  | 10.69600 | 3.40100   |
| H | -9.01680  | 5.34300  | 10.97930  |
| H | -9.01800  | 10.19300 | 6.83300   |
| H | -9.14080  | 7.02020  | -1.66300  |
| H | -9.30820  | 13.01500 | 13.88740  |
| H | -9.31900  | 10.58330 | 18.55040  |
| H | -9.32210  | 18.81080 | -3.12870  |
| H | -9.38900  | 3.30200  | -4.79100  |
| H | -9.41900  | 5.50200  | 5.80600   |
| H | -9.41900  | 12.84100 | -9.75700  |
| H | -9.44700  | 7.70800  | 10.10700  |
| H | -9.45600  | 16.89400 | -1.66900  |
| H | -9.46000  | 15.02700 | -0.22500  |
| H | -9.48000  | 3.24100  | 5.85500   |
| H | -9.50050  | 16.45120 | 14.95690  |
| H | -9.50800  | 14.58000 | -1.88200  |
| H | -9.58900  | 1.16700  | 12.40800  |
| H | -9.63400  | 5.33900  | 1.16600   |
| H | -9.67700  | 17.91600 | 12.50200  |
| H | -9.83400  | 15.76900 | 8.27800   |
| H | -9.89400  | 2.48700  | -1.49900  |
| H | -9.89800  | 4.04500  | 8.30100   |
| H | -9.96360  | 10.77690 | 12.23640  |
| H | -9.97350  | 8.09250  | 16.16870  |
| H | -9.98500  | 14.13700 | 7.41100   |
| H | -10.01500 | 5.04800  | 3.44900   |
| H | -10.03700 | 6.67800  | 6.62700   |
| H | -10.09270 | 14.22560 | -6.25760  |
| H | -10.11800 | 17.78600 | 4.48000   |
| H | -10.14900 | 9.65500  | -7.00100  |
| H | -10.19600 | 13.08500 | 1.88700   |
| H | -10.21400 | 12.63000 | 3.68700   |
| H | -10.32900 | 5.99500  | -4.15200  |
| H | -10.33100 | 10.13800 | 0.87600   |
| H | -10.35600 | 5.42100  | -1.25800  |
| H | -10.40400 | 15.89100 | 2.63300   |
| H | -10.44200 | 6.63700  | 3.58000   |
| H | -10.47000 | 11.88900 | -11.42600 |
| H | -10.48510 | 16.40880 | 10.71970  |
| H | -10.51200 | 3.97600  | 12.04100  |
| H | -10.53200 | 12.56300 | -3.10300  |
| H | -10.58600 | 2.50600  | -3.79400  |
| H | -10.58600 | 11.33200 | 15.70800  |
| H | -10.58800 | 18.56000 | 6.78800   |
| H | -10.62040 | 1.21340  | 6.84710   |
| H | -10.74260 | 9.87760  | -4.80500  |
| H | -10.76700 | 1.75800  | 13.51200  |
| H | -10.77500 | 17.38600 | 13.83200  |
| H | -10.84400 | -0.58640 | 6.43200   |

SupplementaryData.txt

|   |           |          |           |
|---|-----------|----------|-----------|
| H | -10.84830 | 1.45960  | 10.48640  |
| H | -10.91100 | 13.49600 | -11.77500 |
| H | -10.99900 | 4.06600  | -4.35300  |
| H | -11.04100 | 5.33800  | 6.32400   |
| H | -11.05000 | 12.19000 | 9.29500   |
| H | -11.08200 | 8.96700  | 4.49400   |
| H | -11.08200 | 11.68900 | 2.57700   |
| H | -11.09600 | 8.14100  | 11.90000  |
| H | -11.12700 | 10.15300 | 6.56000   |
| H | -11.13200 | 18.61900 | -5.23500  |
| H | -11.24100 | 13.66500 | 11.32900  |
| H | -11.36300 | 6.24000  | 18.01300  |
| H | -11.45900 | 2.30800  | 8.33600   |
| H | -11.46580 | 10.30520 | -2.50980  |
| H | -11.54920 | 11.22390 | -9.28690  |
| H | -11.57540 | 7.72430  | -1.32790  |
| H | -11.66800 | 11.44200 | 5.38300   |
| H | -11.67000 | 4.63200  | -2.36000  |
| H | -11.67700 | 14.70600 | 3.11700   |
| H | -11.71100 | 13.73800 | -3.52900  |
| H | -11.73900 | 15.09200 | 9.08400   |
| H | -11.74100 | 10.14500 | -7.48600  |
| H | -11.74260 | 17.19320 | -3.56860  |
| H | -11.78100 | 12.51900 | 13.13600  |
| H | -11.79600 | 15.88200 | -1.31500  |
| H | -11.84800 | 8.49500  | 18.23100  |
| H | -11.85400 | 12.98800 | 14.88400  |
| H | -11.85700 | 20.11700 | -5.43600  |
| H | -11.92600 | 7.66100  | 5.27100   |
| H | -11.95330 | 16.96310 | 9.17900   |
| H | -12.00000 | 13.00700 | 7.98000   |
| H | -12.03860 | 13.40330 | -7.81350  |
| H | -12.16200 | 17.63800 | 2.92100   |
| H | -12.16500 | 19.98400 | -2.73100  |
| H | -12.32500 | 16.28900 | -8.28400  |
| H | -12.34700 | 8.59900  | 16.47000  |
| H | -12.41400 | 8.17300  | 3.66400   |
| H | -12.53100 | 5.25600  | 13.44100  |
| H | -12.59200 | 10.93400 | 6.97000   |
| H | -12.63700 | 3.69600  | 8.04800   |
| H | -12.76100 | 13.06600 | 10.96000  |
| H | -12.77200 | 2.45300  | 6.19300   |
| H | -12.77600 | 9.41700  | 0.12900   |
| H | -12.80800 | 10.56600 | 3.07400   |
| H | -12.82900 | 15.52700 | -5.48300  |
| H | -12.83000 | 3.36200  | 14.53400  |
| H | -12.88400 | 10.23800 | 14.57900  |
| H | -13.00200 | 13.10800 | -11.79900 |
| H | -13.03300 | 8.91000  | 11.50400  |
| H | -13.05900 | 7.03800  | -0.28300  |
| H | -13.12500 | 12.27000 | -10.27700 |
| H | -13.13500 | 15.26300 | -3.04300  |
| H | -13.13930 | 13.55970 | 13.45230  |
| H | -13.14900 | 14.74000 | 4.99000   |
| H | -13.17200 | 1.40000  | 9.65900   |
| H | -13.31200 | 11.79400 | 15.40700  |
| H | -13.40500 | 12.22500 | 5.07800   |
| H | -13.43500 | 16.72700 | -6.44000  |
| H | -13.44800 | 12.21200 | -3.68000  |
| H | -13.45000 | 13.96400 | 9.55500   |
| H | -13.47710 | 7.09520  | 15.64270  |
| H | -13.57800 | 15.55400 | 7.25200   |
| H | -13.64500 | 12.19100 | 9.59700   |
| H | -13.66200 | 7.58300  | 1.26200   |
| H | -13.74900 | 9.43000  | 5.69800   |
| H | -13.80980 | 5.63190  | 11.46290  |
| H | -13.82110 | 15.24800 | 2.91120   |
| H | -13.84400 | 5.77900  | 3.36500   |

SupplementaryData.txt

|   |           |          |          |
|---|-----------|----------|----------|
| H | -13.94200 | 3.81800  | 15.75200 |
| H | -13.99850 | 15.91930 | 0.51450  |
| H | -14.04600 | 9.51400  | 10.07600 |
| H | -14.07970 | 8.61640  | 17.73090 |
| H | -14.15200 | 1.90300  | 7.10300  |
| H | -14.21200 | 9.69300  | 3.44700  |
| H | -14.27000 | 7.84600  | -1.79200 |
| H | -14.27500 | 2.40000  | 14.78500 |
| H | -14.30500 | 4.14500  | 3.94100  |
| H | -14.45300 | 13.96600 | -6.88800 |
| H | -14.58490 | 13.32420 | 12.40680 |
| H | -14.60800 | 10.83000 | -0.76100 |
| H | -14.66200 | 15.85300 | -2.52500 |
| H | -14.67800 | 5.50800  | 4.93700  |
| H | -14.67920 | 4.05700  | 9.84680  |
| H | -14.68100 | 4.42800  | 12.94000 |
| H | -14.74400 | 7.11500  | -0.06500 |
| H | -14.80460 | 21.10410 | -4.54640 |
| H | -14.95900 | 15.23000 | -7.72100 |
| H | -15.06500 | 9.88600  | 0.72500  |
| H | -15.22700 | 5.16900  | 15.72200 |
| H | -15.23400 | 3.60500  | 2.00100  |
| H | -15.43400 | 8.14900  | 11.48000 |
| H | -15.44300 | 7.75700  | 4.07800  |
| H | -15.53100 | 12.97200 | 0.76700  |
| H | -15.59400 | 9.46500  | -0.96100 |
| H | -15.70850 | 10.52780 | 5.47940  |
| H | -15.73300 | 14.50300 | -4.90200 |
| H | -15.90000 | 12.23700 | 8.53800  |
| H | -15.94100 | 16.43000 | 5.55300  |
| H | -16.02500 | 6.02000  | 14.44700 |
| H | -16.09880 | 18.68540 | -3.71480 |
| H | -16.15230 | 14.38560 | 3.97520  |
| H | -16.15600 | 4.99800  | 1.27800  |
| H | -16.26100 | -0.04400 | 7.31500  |
| H | -16.29400 | -1.73800 | 7.01200  |
| H | -16.32300 | 3.20800  | 15.38700 |
| H | -16.35710 | 11.64300 | 3.15380  |
| H | -16.37100 | 6.92800  | 2.19100  |
| H | -16.38900 | 3.42100  | 11.83600 |
| H | -16.47430 | 8.61310  | 9.22110  |
| H | -16.51600 | 10.68500 | 8.11000  |
| H | -16.55200 | 17.94600 | 5.00000  |
| H | -16.59000 | 4.54800  | 4.12200  |
| H | -16.69640 | 16.76870 | -6.10890 |
| H | -16.72500 | 14.92800 | -6.29200 |
| H | -16.79500 | 3.71800  | 9.32500  |
| H | -16.84200 | 16.91100 | 2.70200  |
| H | -16.89300 | 6.00700  | 7.71800  |
| H | -16.90000 | -0.59900 | 5.88100  |
| H | -17.05800 | 3.77800  | 2.13100  |
| H | -17.10700 | 11.46700 | -0.23800 |
| H | -17.13520 | 17.90970 | -2.56420 |
| H | -17.18320 | 16.23270 | 7.12560  |
| H | -17.18950 | 5.97650  | 5.72850  |
| H | -17.33800 | 1.96000  | 11.74900 |
| H | -17.34500 | 4.58400  | 15.87300 |
| H | -17.40300 | 3.72700  | 14.20300 |
| H | -17.42490 | 14.93810 | -4.34410 |
| H | -17.66200 | 13.13500 | 6.76200  |
| H | -17.80000 | 6.28700  | 2.97900  |
| H | -17.84450 | 10.07300 | 6.40450  |
| H | -17.88740 | 15.81750 | -2.92550 |
| H | -17.91300 | -0.89000 | 8.80800  |
| H | -17.97800 | 10.93300 | 1.24000  |
| H | -18.03550 | 11.15530 | 12.59700 |
| H | -18.06000 | 13.79700 | 0.71300  |
| H | -18.12380 | 0.73180  | 5.51540  |



SupplementaryData.txt

|   |           |          |          |
|---|-----------|----------|----------|
| H | -18.19000 | 12.78900 | 2.15800  |
| H | -18.28570 | 1.19130  | 9.88080  |
| H | -18.37600 | 12.74400 | 9.40200  |
| H | -18.72510 | 12.47280 | 11.51530 |
| H | -18.80900 | 11.26900 | 8.90000  |
| H | -18.82700 | 15.51270 | 6.99210  |
| H | -18.82900 | 3.05700  | 4.00800  |
| H | -18.85970 | 8.00460  | 5.27530  |
| H | -18.87400 | 6.89900  | 9.18500  |
| H | -18.99200 | 6.65700  | 7.46400  |
| H | -19.07400 | -2.80300 | 7.34100  |
| H | -19.21400 | 2.34880  | 12.89830 |
| H | -19.39120 | 8.88850  | 8.85260  |
| H | -19.50100 | 10.10200 | 3.33700  |
| H | -19.55200 | 0.58900  | 3.60400  |
| H | -19.57600 | 0.83500  | 1.77400  |
| H | -19.66200 | 1.05800  | -0.59700 |
| H | -19.70300 | 0.52900  | 8.10400  |
| H | -19.86900 | -1.60700 | 8.54100  |
| H | -20.03900 | -1.41200 | 6.84400  |
| H | -20.05500 | 3.21400  | -1.63300 |
| H | -20.23300 | 4.99100  | 2.24200  |
| H | -20.29210 | 3.80550  | 12.51090 |
| H | -20.35100 | 5.18300  | -0.22500 |
| H | -20.50200 | 3.41300  | 4.12000  |
| H | -20.60000 | 9.39700  | 5.99200  |
| H | -20.90800 | 7.07300  | 5.49600  |
| H | -21.08200 | 10.79600 | 4.99500  |
| H | -21.84800 | 1.16330  | 2.67080  |
| H | -22.02500 | 0.25370  | 4.14000  |
| H | -22.06490 | 2.02060  | 4.15790  |
| H | -22.09500 | 5.35000  | 4.12200  |
| H | -22.11200 | 10.11400 | 2.72200  |
| H | -23.25800 | 8.39200  | 1.32900  |
| H | -24.40890 | 6.06010  | 1.85010  |
| H | -6.76440  | 4.00080  | 15.72140 |
| H | -0.84810  | 0.38030  | 7.26950  |
| N | -0.60500  | 6.53600  | 6.49500  |
| N | -1.28700  | 20.22800 | 13.78900 |
| N | -1.60200  | 0.88000  | 6.82000  |
| N | -2.16400  | 6.98600  | 9.61400  |
| N | -2.67500  | 5.08100  | 5.51500  |
| N | -3.08600  | 1.22600  | 5.34500  |
| N | -3.45700  | 17.88000 | 12.19000 |
| N | -3.60600  | 17.54400 | 8.57600  |
| N | -3.76000  | 19.70500 | 18.30600 |
| N | -4.77000  | 8.45500  | 3.79800  |
| N | -4.89600  | 6.88600  | 1.46200  |
| N | -5.10300  | 6.50000  | 5.76700  |
| N | -5.16800  | 5.10600  | 10.09700 |
| N | -5.19100  | 17.53500 | 5.83300  |
| N | -5.36900  | 17.18900 | 2.65300  |
| N | -7.04400  | 13.02800 | 12.95500 |
| N | -7.36700  | 3.41900  | 15.15700 |
| N | -7.65600  | 8.05700  | 16.00900 |
| N | -7.66100  | 5.99400  | 1.60600  |
| N | -7.67600  | 17.53900 | 0.17300  |
| N | -8.01100  | 8.05900  | 13.11300 |
| N | -8.09900  | 1.52700  | 14.41200 |
| N | -8.15400  | 9.19700  | -1.30800 |
| N | -8.18400  | 13.77800 | 10.51900 |
| N | -8.34500  | 16.04400 | -3.16900 |
| N | -8.49700  | 4.46800  | 10.64900 |
| N | -8.86300  | 16.93400 | 14.24600 |
| N | -8.96200  | 8.54300  | 1.27500  |
| N | -9.10900  | 19.75100 | -3.59300 |
| N | -9.23800  | 12.04800 | 14.34000 |
| N | -9.47000  | 7.17000  | -2.67000 |

SupplementaryData.txt

|   |           |          |          |
|---|-----------|----------|----------|
| N | -9.97300  | 15.28700 | -6.19500 |
| N | -10.09000 | 7.37400  | 16.95300 |
| N | -10.14100 | 9.82900  | 12.70000 |
| N | -10.32600 | 15.54300 | 11.32800 |
| N | -10.88500 | 11.90200 | -8.79300 |
| N | -11.07400 | 2.42900  | 10.87900 |
| N | -11.20500 | 10.57000 | -5.47700 |
| N | -11.25700 | 0.37400  | 6.66000  |
| N | -11.66600 | 14.35700 | -8.12400 |
| N | -12.23400 | 7.74100  | -2.17100 |
| N | -12.27100 | 17.94400 | -3.01900 |
| N | -12.40300 | 10.49500 | -2.99000 |
| N | -12.87500 | 6.29300  | 15.27000 |
| N | -13.05600 | 16.26700 | 0.14600  |
| N | -13.71600 | 16.30400 | 2.77400  |
| N | -13.92300 | 12.90400 | 13.13500 |
| N | -14.06500 | 6.62300  | 11.77500 |
| N | -14.48000 | 3.00600  | 9.82100  |
| N | -15.31000 | 11.50300 | 5.29200  |
| N | -15.73700 | 12.42000 | 2.75800  |
| N | -15.99200 | 16.53200 | -5.33900 |
| N | -16.16900 | 15.07500 | 3.15700  |
| N | -16.23100 | 7.58300  | 9.06400  |
| N | -16.61700 | 17.88300 | -3.41900 |
| N | -16.76700 | 6.95600  | 5.64500  |
| N | -17.37100 | 15.76200 | -3.78000 |
| N | -17.73400 | 1.83800  | 9.23100  |
| N | -17.93200 | 11.09500 | 6.10000  |
| N | -17.98300 | 15.92900 | 6.48300  |
| N | -18.15700 | 11.57200 | 11.61900 |
| N | -18.48900 | 8.76400  | 4.61900  |
| N | -19.02200 | 0.76400  | 6.09600  |
| N | -19.38100 | 3.26300  | 12.36800 |
| N | -21.62400 | 1.15100  | 3.71700  |
| O | 0.43900   | 4.56800  | 4.64500  |
| O | 0.48500   | 20.90400 | 16.33000 |
| O | 2.12000   | 19.86300 | 15.21700 |
| O | -0.97900  | 18.01800 | 13.50900 |
| O | -1.89900  | 12.42700 | 7.74500  |
| O | -1.90000  | 3.59200  | -0.95900 |
| O | -2.46300  | 7.83300  | 6.76800  |
| O | -2.67500  | 6.16100  | 3.56300  |
| O | -2.86700  | 5.13100  | 8.51800  |
| O | -3.07600  | 19.33700 | 10.53500 |
| O | -3.36500  | 17.92500 | 4.49700  |
| O | -4.20100  | 3.67300  | -1.43300 |
| O | -4.42800  | 15.53000 | 13.05300 |
| O | -5.56100  | 8.65200  | 0.34900  |
| O | -5.73000  | 18.19300 | 8.94600  |
| O | -5.88500  | 7.33000  | -8.46800 |
| O | -6.06600  | 5.10200  | 4.29900  |
| O | -6.40200  | 17.42500 | -1.65000 |
| O | -6.60300  | 10.99200 | 11.92200 |
| O | -6.69200  | 6.78500  | 10.49300 |
| O | -6.81460  | 15.92400 | 13.31410 |
| O | -6.96000  | 19.62700 | 6.76500  |
| O | -7.00300  | 8.48600  | 3.70300  |
| O | -7.06900  | 5.87800  | 15.67300 |
| O | -7.54300  | 16.78500 | 2.74000  |
| O | -7.56900  | 6.00900  | -0.59800 |
| O | -7.91400  | 10.42800 | 15.16600 |
| O | -8.34400  | 2.20100  | 10.35700 |
| O | -8.88900  | 9.80500  | 17.99200 |
| O | -9.18200  | 6.25900  | 18.76700 |
| O | -9.37200  | 6.30500  | 12.69600 |
| O | -9.50200  | 8.52800  | -4.42400 |
| O | -9.53300  | 12.08200 | 11.01500 |
| O | -9.55500  | 12.49800 | -7.00800 |

SupplementaryData.txt

|   |           |          |           |
|---|-----------|----------|-----------|
| O | -9.83400  | 14.77200 | 13.38900  |
| O | -9.86900  | 21.31900 | -5.06000  |
| O | -9.99700  | 10.38400 | -1.53600  |
| O | -10.37700 | 15.42700 | -9.69200  |
| O | -10.55000 | 7.41500  | 0.31400   |
| O | -10.56500 | 15.94800 | -3.67300  |
| O | -10.78200 | 17.35100 | -6.60900  |
| O | -10.80000 | 8.88300  | 14.64100  |
| O | -10.95100 | 17.09700 | 0.49400   |
| O | -11.11300 | 5.02300  | 15.41700  |
| O | -12.40200 | 4.25100  | 11.10600  |
| O | -12.41500 | 17.54000 | 8.43300   |
| O | -12.50700 | 12.27000 | -6.15000  |
| O | -12.71600 | 7.04800  | -4.20600  |
| O | -12.84400 | 9.91200  | -11.80000 |
| O | -13.24100 | -0.59400 | 6.42000   |
| O | -13.31600 | 11.49900 | -13.25000 |
| O | -13.54400 | 18.52800 | -1.22500  |
| O | -13.63600 | 7.66500  | 17.71100  |
| O | -13.70500 | 13.38600 | 2.73100   |
| O | -13.91100 | 20.91800 | -4.13800  |
| O | -14.25900 | 7.94800  | 13.61900  |
| O | -14.33600 | 18.79700 | -4.78500  |
| O | -14.53900 | 9.97200  | -3.36900  |
| O | -14.65500 | 18.36400 | 2.88600   |
| O | -14.99400 | 10.92100 | 13.19300  |
| O | -15.02900 | 5.73900  | 9.51900   |
| O | -15.35000 | 0.89600  | 9.81400   |
| O | -15.56600 | 13.68100 | 5.77200   |
| O | -16.01800 | 8.81000  | 6.66900   |
| O | -16.14700 | 15.47200 | 0.88000   |
| O | -16.82200 | 9.54600  | 3.29200   |
| O | -16.86100 | 10.03000 | 10.59000  |
| O | -17.15500 | 2.35600  | 7.16900   |
| O | -18.59400 | 4.76100  | 10.78500  |
| O | -18.72200 | 12.31000 | 4.33700   |
| O | -18.83600 | 8.59800  | 8.01000   |
| O | -18.94600 | 15.96600 | 4.48000   |
| O | -18.95200 | 11.92500 | -1.58800  |
| O | -20.22200 | 11.62900 | 0.30300   |
| O | -21.24900 | 1.03200  | 6.24900   |
| O | -23.38500 | 5.83300  | 1.90000   |
| S | -4.20400  | 6.79300  | 14.15100  |
| S | -4.52800  | 5.04100  | 13.23200  |
| S | -10.92600 | 9.43700  | 9.57900   |
| S | -12.02500 | 13.10100 | -1.36800  |
| S | -12.39200 | 8.04000  | 9.39800   |
| S | -13.95600 | 13.76900 | -1.58700  |

Table 5: Cartesian coordinates of the model of vitamin B12 (Angstrom).

| Atom | x        | y        | z        |
|------|----------|----------|----------|
| C    | -0.33160 | -6.46582 | -0.86703 |
| C    | 0.68325  | -5.39375 | -1.30691 |
| C    | 0.58372  | -4.09773 | -0.55870 |
| C    | 0.61920  | -2.68974 | 1.18678  |
| C    | 0.29812  | -2.80644 | -0.97674 |
| C    | 0.30930  | 6.40091  | -1.16426 |
| C    | -0.79941 | 5.34950  | -1.36096 |
| C    | -0.60130 | 4.08425  | -0.58053 |
| C    | -0.36515 | 2.75418  | 1.21067  |
| C    | -0.40947 | 2.77014  | -0.97944 |
| C    | -2.82487 | -0.07719 | -0.33258 |
| C    | -3.77241 | -0.69405 | -1.37729 |

SupplementaryData.txt

|    |          |          |          |
|----|----------|----------|----------|
| C  | -3.06679 | -0.35715 | -2.71519 |
| C  | -1.61133 | -0.23143 | -2.30504 |
| C  | 0.81296  | 0.03680  | -2.74149 |
| C  | 2.01742  | 0.13787  | -3.65572 |
| C  | 3.19402  | 0.36718  | -2.69043 |
| C  | 2.54436  | 0.34310  | -1.32491 |
| C  | 2.73313  | 0.45083  | 1.16116  |
| C  | 3.56625  | 0.64514  | 2.40930  |
| C  | 2.53847  | 0.55447  | 3.55128  |
| C  | 1.22868  | 0.27805  | 2.83880  |
| C  | -1.20672 | -0.18573 | 2.79452  |
| C  | -2.55254 | -0.48463 | 3.42970  |
| C  | -3.52525 | -0.39031 | 2.22731  |
| C  | -2.61665 | -0.73342 | 1.03288  |
| C  | -0.48490 | -0.15946 | -3.18186 |
| C  | 3.26320  | 0.48972  | -0.13141 |
| C  | 0.01374  | 0.09887  | 3.48241  |
| Co | 0.01479  | 0.00525  | 0.13032  |
| H  | -0.20028 | -6.75712 | 0.19533  |
| H  | 1.71777  | -5.79095 | -1.20581 |
| H  | 0.55498  | -5.16644 | -2.38397 |
| H  | 1.00949  | -4.75528 | 1.44378  |
| H  | 0.71521  | -2.33385 | 2.21727  |
| H  | 0.08004  | -2.46098 | -1.99074 |
| H  | -1.78629 | 5.78880  | -1.09431 |
| H  | -0.87531 | 5.07183  | -2.43112 |
| H  | -0.67366 | 4.83742  | 1.43203  |
| H  | -0.30388 | 2.44287  | 2.25828  |
| H  | -0.37380 | 2.37521  | -1.99830 |
| H  | -0.65769 | -0.25294 | -4.26261 |
| H  | 4.34683  | 0.65038  | -0.22127 |
| H  | -0.00772 | 0.16194  | 4.57907  |
| H  | -1.37444 | -6.11567 | -0.99823 |
| H  | -0.20241 | -7.38382 | -1.47200 |
| H  | 0.38096  | 6.74237  | -0.11127 |
| H  | 0.09936  | 7.29599  | -1.78094 |
| H  | 1.30039  | 6.00595  | -1.46273 |
| H  | -4.80275 | -0.29776 | -1.31655 |
| H  | -3.82151 | -1.79409 | -1.23886 |
| H  | -3.21566 | -1.11426 | -3.51039 |
| H  | -3.41032 | 0.61404  | -3.13622 |
| H  | 2.12750  | -0.78900 | -4.25508 |
| H  | 1.88488  | 0.96213  | -4.38580 |
| H  | 3.97982  | -0.41360 | -2.75970 |
| H  | 3.71143  | 1.33594  | -2.85289 |
| H  | 4.35632  | -0.13272 | 2.47066  |
| H  | 4.09923  | 1.61767  | 2.37341  |
| H  | 2.46805  | 1.49106  | 4.14223  |
| H  | 2.76512  | -0.25009 | 4.27987  |
| H  | -2.78946 | 0.20768  | 4.26177  |
| H  | -2.52905 | -1.50711 | 3.86899  |
| H  | -3.90685 | 0.64700  | 2.12572  |
| H  | -4.39687 | -1.06436 | 2.31776  |
| H  | -2.55850 | -1.83791 | 0.88206  |
| H  | -3.06665 | 1.00013  | -0.16794 |
| N  | 0.77712  | -3.98489 | 0.81131  |
| N  | 0.32895  | -1.94647 | 0.11209  |
| N  | -0.56514 | 4.03491  | 0.80639  |
| N  | -0.26338 | 1.96012  | 0.13850  |
| N  | -1.50168 | -0.14169 | -0.99794 |
| N  | 1.20115  | 0.16555  | -1.41473 |
| N  | 1.42401  | 0.23514  | 1.46643  |
| N  | -1.28145 | -0.26995 | 1.48384  |

---
